# Supplementary material for: Phylogenetically typing bacterial strains from partial SNP genotypes observed from direct sequencing of clinical specimen metagenomic data
Source: PubMed Central journal article supplement (PMC4487561; doi:10.1186/s13073-015-0176-9), 2015-06-09
Supplement: 13073_2015_176_MOESM2_ESM.pdf [file 13073_2015_176_MOESM2_ESM.pdf]

| Genome name         | Assembly name                                |
|---------------------|----------------------------------------------|
| W3110               | ASM1024v1                                    |
| SE11                | ASM1038v1                                    |
| SE15                | ASM1048v1                                    |
| UTI89               | ASM1326v1                                    |
| 536                 | ASM1330v1                                    |
| KO11FL              | ASM14785v3                                   |
| APEC_01             | ASM1484v1                                    |
| B088                | ASM16315v1                                   |
| B185                | ASM16317v1                                   |
| B354                | ASM16319v1                                   |
| MS_198-1            | ASM16419v1                                   |
| MS_84-1             | ASM16421v1                                   |
| MS_115-1            | ASM16423v1                                   |
| MS_146-1            | ASM16427v1                                   |
| MS_69-1             | ASM16431v1                                   |
| MS_187-1            | ASM16433v1                                   |
| MS_21-1             | ASM16435v1                                   |
| MS_117-3            | ASM16437v1                                   |
| MS_153-1            | ASM16443v1                                   |
| MS_78-1             | ASM16445v1                                   |
| MS_116-1            | ASM16447v1                                   |
| MS_175-1            | ASM16451v1                                   |
| MS_196-1            | ASM16455v1                                   |
| MS_185-1            | ASM16457v1                                   |
| MS_57-2             | ASM16461v1                                   |
| 1827-70             | ASM16565v1                                   |
| TW10598             | ASM16653v2                                   |
| TW10828             | ASM16657v2                                   |
| TW11681             | ASM16659v2                                   |
| TW14425             | ASM16661v2                                   |
| B7A                 | ASM16781v1                                   |
| E110019             | ASM16787v1                                   |
| 53638               | ASM16791v2                                   |
| 101-1               | ASM16809v1                                   |
| H736                | ASM17653v2                                   |
| M718                | ASM17657v2                                   |
| TA206               | ASM17659v2                                   |
| TA143               | ASM17661v2                                   |
| TA280               | ASM17665v2                                   |
| H591                | ASM17667v2                                   |
| H299                | ASM17669v2                                   |
| E24377A             | ASM1774v1                                    |
| HS                  | ASM1776v1                                    |
| MS_79-10            | ASM17909v1                                   |
| MS_145-7            | ASM17911v1                                   |
| 3431                | ASM18476v2                                   |
| G5101               | ASM18728v4                                   |
| 3256-97             | ASM18734v2                                   |
| USDA_5905           | ASM18736v2                                   |
| LT-68               | ASM18881v2                                   |
| OK1357              | ASM18885v2                                   |
| E1167               | ASM19079v1                                   |
| E1520               | ASM19081v1                                   |
| E482                | ASM19083v1                                   |
| H120                | ASM19085v1                                   |
| TA007               | ASM19097v1                                   |
| H489                | ASM19101v1                                   |
| ATCC_8739           | ASM1938v1                                    |
| WV_060327           | ASM19397v2                                   |
| EC4100B             | ASM19399v2                                   |
| 97.0246             | ASM19421v2                                   |
| 97.0259             | ASM19423v2                                   |
| 95.0941             | ASM19425v1                                   |
| 97.0264             | ASM19429v1                                   |
| JB1-95              | ASM19435v2                                   |
| 1.2264              | ASM19441v2                                   |
| 99.0741             | ASM19443v2                                   |
| 9.1649              | ASM19447v1                                   |
| 2.4168              | ASM19455v2                                   |
| TW07793             | ASM19468v2                                   |
| B41                 | ASM19470v2                                   |
| SMS-3-5             | ASM1964v1                                    |
| H10407              | ASM21047v1                                   |
| AA86                | ASM21139v1                                   |
| UMNK88              | ASM21271v2                                   |
| NA114               | ASM21476v2                                   |
| 5.0588              | ASM21514v2                                   |
| 3.2608              | ASM21520v2                                   |
| 9.0111              | ASM21526v2                                   |
| 3.3884              | ASM21528v2                                   |
| PCN033              | ASM21951v2                                   |
| STEC_B2F1           | ASM22502v2                                   |
| STEC_C165-02        | ASM22504v2                                   |
| 3030-1              | ASM22508v2                                   |
| STEC_94C            | ASM22510v2                                   |
| STEC_DG131-3        | ASM22512v2                                   |
| STEC_EH250          | ASM22514v2                                   |
| G58-1               | ASM22516v2                                   |
| STEC_MHI813         | ASM22520v2                                   |
| STEC_S1191          | ASM22522v2                                   |
| TX1999              | ASM22524v2                                   |
| BL21(DE3)           | ASM22666v1                                   |
| O7:K1_CE10          | ASM22762v1                                   |
| cloneA_i1           | ASM23367v2                                   |
| O113:H21_CL-3       | ASM23423v2                                   |
| O121:H19_MT#2       | ASM23427v2                                   |
| O145:H28_4865/96    | ASM23431v2                                   |
| BL21-Gold(DE3)pLysS | ASM2366v1                                    |
| DEC1D               | ASM24911v2                                   |
| DEC2A               | ASM24915v2                                   |
| DEC5E               | ASM24957v2                                   |
| DEC6B               | ASM24961v2                                   |
| DEC6D               | ASM24965v2                                   |
| DEC7B               | ASM24971v2                                   |
| DEC9E               | ASM24997v2                                   |
| DEC10F              | ASM25009v2                                   |
| DEC11A              | ASM25011v2                                   |
| DEC12C              | ASM25025v2                                   |
| DEC13A              | ASM25031v2                                   |
| DEC14A              | ASM25041v2                                   |
| DEC14C              | ASM25045v2                                   |
| DEC14D              | ASM25047v2                                   |
| DEC15A              | ASM25049v2                                   |
| SCI-07              | ASM25280v2                                   |
| P12b                | ASM25727v1                                   |
| W26                 | ASM25822v1                                   |
| ON2010              | ASM25863v1                                   |
| O32:H37_P4          | ASM25942v1                                   |
| IAI1                | ASM2626v1                                    |
| O103:H25_CVM9340    | ASM26389v1                                   |
| O26:H11_CVM10026    | ASM26403v1                                   |
| KD1                 | ASM26409v1                                   |
| 541-15              | ASM26411v1                                   |
| 75                  | ASM26415v1                                   |
| 541-1               | ASM26421v1                                   |
| CUMT8               | ASM26423v1                                   |
| O127:H6_E2348/69    | ASM2654v1                                    |
| C342-62             | ASM26820v1                                   |
| 042                 | ASM2712v1                                    |
| STEC_O31            | ASM28177v1                                   |
| LF82                | ASM28449v1                                   |
| J96                 | ASM29577v2                                   |
| 0.1288              | ASM30325v1                                   |
| EC1864              | ASM30341v1                                   |
| N1                  | ASM30363v1                                   |
| 07798               | ASM30365v1                                   |
| ARS4.2123           | ASM30409v1                                   |
| TW00353             | ASM30411v1                                   |
| 3006                | ASM30413v1                                   |
| 8.0566              | ASM30517v1                                   |
| chi7122             | ASM30720v1                                   |
| E2265               | E2265_1                                      |
| AI27                | ECAI27.hybrid.1                              |
| AB42410445-isolate1 | E_coliAB42410445-isolate1-1.0                |
| NCCP15657           | EscCol1.0                                    |
| 4_1_47FAA           | Esch_coli_4_1_47FAA_V1                       |
| B093                | Esch_coli_B093_V1                            |
| B799                | Esch_coli_B799_V1                            |
| O104:H4_C227-11     | Esch_coli_C227-11_V2                         |
| E101                | Esch_coli_E101_V1                            |
| H494                | Esch_coli_H494_V1                            |
| KTE100              | Esch_coli_KTE100_V1                          |
| KTE102              | Esch_coli_KTE102_V1                          |
| KTE103              | Esch_coli_KTE103_V1                          |
| KTE107              | Esch_coli_KTE107_V1                          |
| KTE108              | Esch_coli_KTE108_V1                          |
| KTE10               | Esch_coli_KTE10_V1                           |
| KTE111              | Esch_coli_KTE111_V1                          |
| KTE115              | Esch_coli_KTE115_V1                          |
| KTE119              | Esch_coli_KTE119_V1                          |
| KTE120              | Esch_coli_KTE120_V1                          |
| KTE121              | Esch_coli_KTE121_V1                          |
| KTE122              | Esch_coli_KTE122_V1                          |
| KTE134              | Esch_coli_KTE134_V1                          |
| KTE135              | Esch_coli_KTE135_V1                          |
| KTE136              | Esch_coli_KTE136_V1                          |
| KTE13               | Esch_coli_KTE13_V1                           |
| KTE142              | Esch_coli_KTE142_V1                          |
| KTE144              | Esch_coli_KTE144_V1                          |
| KTE147              | Esch_coli_KTE147_V1                          |
| KTE14               | Esch_coli_KTE14_V1                           |
| KTE154              | Esch_coli_KTE154_V1                          |
| KTE155              | Esch_coli_KTE155_V1                          |
| KTE156              | Esch_coli_KTE156_V1                          |
| KTE158              | Esch_coli_KTE158_V1                          |
| KTE161              | Esch_coli_KTE161_V1                          |
| KTE165              | Esch_coli_KTE165_V1                          |
| KTE171              | Esch_coli_KTE171_V1                          |
| KTE172              | Esch_coli_KTE172_V1                          |
| KTE178              | Esch_coli_KTE178_V1                          |
| KTE17               | Esch_coli_KTE17_V1                           |
| KTE181              | Esch_coli_KTE181_V1                          |
| KTE182              | Esch_coli_KTE182_V1                          |
| KTE184              | Esch_coli_KTE184_V1                          |
| KTE185              | Esch_coli_KTE185_V1                          |
| KTE186              | Esch_coli_KTE186_V1                          |
| KTE187              | Esch_coli_KTE187_V1                          |
| KTE189              | Esch_coli_KTE189_V1                          |
| KTE190              | Esch_coli_KTE190_V1                          |
| KTE191              | Esch_coli_KTE191_V1                          |
| KTE192              | Esch_coli_KTE192_V1                          |
| KTE193              | Esch_coli_KTE193_V1                          |
| KTE195              | Esch_coli_KTE195_V1                          |
| KTE196              | Esch_coli_KTE196_V1                          |
| KTE197              | Esch_coli_KTE197_V1                          |
| KTE19               | Esch_coli_KTE19_V1                           |
| KTE202              | Esch_coli_KTE202_V1                          |
| KTE206              | Esch_coli_KTE206_V1                          |
| KTE209              | Esch_coli_KTE209_V1                          |
| KTE20               | Esch_coli_KTE20_V1                           |
| KTE210              | Esch_coli_KTE210_V1                          |
| KTE212              | Esch_coli_KTE212_V1                          |
| KTE213              | Esch_coli_KTE213_V1                          |
| KTE214              | Esch_coli_KTE214_V1                          |
| KTE215              | Esch_coli_KTE215_V1                          |
| KTE211              | Esch_coli_KTE221_V1                          |
| KTE222              | Esch_coli_KTE222_V1                          |
| KTE227              | Esch_coli_KTE227_V1                          |
| KTE228              | Esch_coli_KTE228_V1                          |
| KTE22               | Esch_coli_KTE22_V1                           |
| KTE233              | Esch_coli_KTE233_V1                          |
| KTE234              | Esch_coli_KTE234_V1                          |
| KTE24               | Esch_coli_KTE24_V1                           |
| KTE26               | Esch_coli_KTE26_V1                           |
| KTE28               | Esch_coli_KTE28_V1                           |
| KTE29               | Esch_coli_KTE29_V1                           |
| KTE35               | Esch_coli_KTE35_V1                           |
| KTE37               | Esch_coli_KTE37_V1                           |
| KTE40               | Esch_coli_KTE40_V1                           |
| KTE41               | Esch_coli_KTE41_V1                           |
| KTE42               | Esch_coli_KTE42_V1                           |
| KTE43               | Esch_coli_KTE43_V1                           |
| KTE44               | Esch_coli_KTE44_V1                           |
| KTE46               | Esch_coli_KTE46_V1                           |
| KTE47               | Esch_coli_KTE47_V1                           |
| KTE48               | Esch_coli_KTE48_V1                           |
| KTE4                | Esch_coli_KTE4_V1                            |
| KTE50               | Esch_coli_KTE50_V1                           |
| KTE54               | Esch_coli_KTE54_V1                           |
| KTE56               | Esch_coli_KTE56_V1                           |
| KTE57               | Esch_coli_KTE57_V1                           |
| KTE60               | Esch_coli_KTE60_V1                           |
| KTE61               | Esch_coli_KTE61_V1                           |
| KTE63               | Esch_coli_KTE63_V1                           |
| KTE64               | Esch_coli_KTE64_V1                           |
| KTE67               | Esch_coli_KTE67_V1                           |
| KTE68               | Esch_coli_KTE68_V1                           |
| KTE73               | Esch_coli_KTE73_V1                           |
| KTE75               | Esch_coli_KTE75_V1                           |
| KTE76               | Esch_coli_KTE76_V1                           |
| KTE77               | Esch_coli_KTE77_V1                           |
| KTE79               | Esch_coli_KTE79_V1                           |
| KTE7                | Esch_coli_KTE7_V1                            |
| KTE80               | Esch_coli_KTE80_V1                           |
| KTE81               | Esch_coli_KTE81_V1                           |
| KTE84               | Esch_coli_KTE84_V1                           |
| KTE98               | Esch_coli_KTE98_V1                           |
| M919                | Esch_coli_KTE9_V1                            |
| M919                | Esch_coli_M919_V2                            |
| SWW33               | Esch_coli_SWW33_V1                           |
| TA124               | Esch_coli_TA124_V1                           |
| NCCP15647           | NCCP15647_1.0                                |
| NCCP15658           | NCCP15658v1.0                                |
| TW10509             | TW10509                                      |
| LCT-EC52            | genome_assembly_of_LCT-EC52_strain_of_E.coli |
