# Supplementary material for: Phylogenetically typing bacterial strains from partial SNP genotypes observed from direct sequencing of clinical specimen metagenomic data
Source: PubMed Central journal article supplement (PMC4487561; doi:10.1186/s13073-015-0176-9), 2015-06-09
Supplement: 13073_2015_176_MOESM4_ESM.pdf [file 13073_2015_176_MOESM4_ESM.pdf]

| <u>Genome</u> | <u>Serotype</u> | <u>Pathovar</u> | <u>Phylogroup</u> | <u>SRA accession</u> | <u>Sequencing Platform</u> |
|---------------|-----------------|-----------------|-------------------|----------------------|----------------------------|
| C227-11       | O104:H4         | EAEC/STEC       | B1                | SRR341579            | HiSeq                      |
| 86-24         | O157:H7         | STEC            | E                 | SRR1639082           | HiSeq                      |
| C844-97       | O157:H45        | aEPEC           | B2                | SRR1772997           | HiSeq                      |
| sakai         | O157:H7         | STEC            | E                 | SRR587217            | MiSeq                      |
| C260-92       | O127:K-:H40     | aEPEC           | A                 | SRR1773018           | HiSeq                      |
| KTE9          | unknown         | N/A             | D                 | SRR640937            | HiSeq                      |

| <u>read length</u> | <u>average positions for<br/>accurate placement &gt; 95%</u> | <u>read<br/>coverage for</u> |
|--------------------|--------------------------------------------------------------|------------------------------|
| 100                | 979                                                          | <0.01x                       |
| 100                | 932                                                          | <0.01x                       |
| 100                | 1062                                                         | <0.01x                       |
| 250                | 361                                                          | <0.01x                       |
| 100                | 73664                                                        | 0.42x                        |
| 100                | 2663                                                         | 0.14x                        |
