# Supplementary material for: Phylogenetically typing bacterial strains from partial SNP genotypes observed from direct sequencing of clinical specimen metagenomic data
Source: PubMed Central journal article supplement (PMC4487561; doi:10.1186/s13073-015-0176-9), 2015-06-09
Supplement: 13073_2015_176_MOESM8_ESM.pdf [file 13073_2015_176_MOESM8_ESM.pdf]

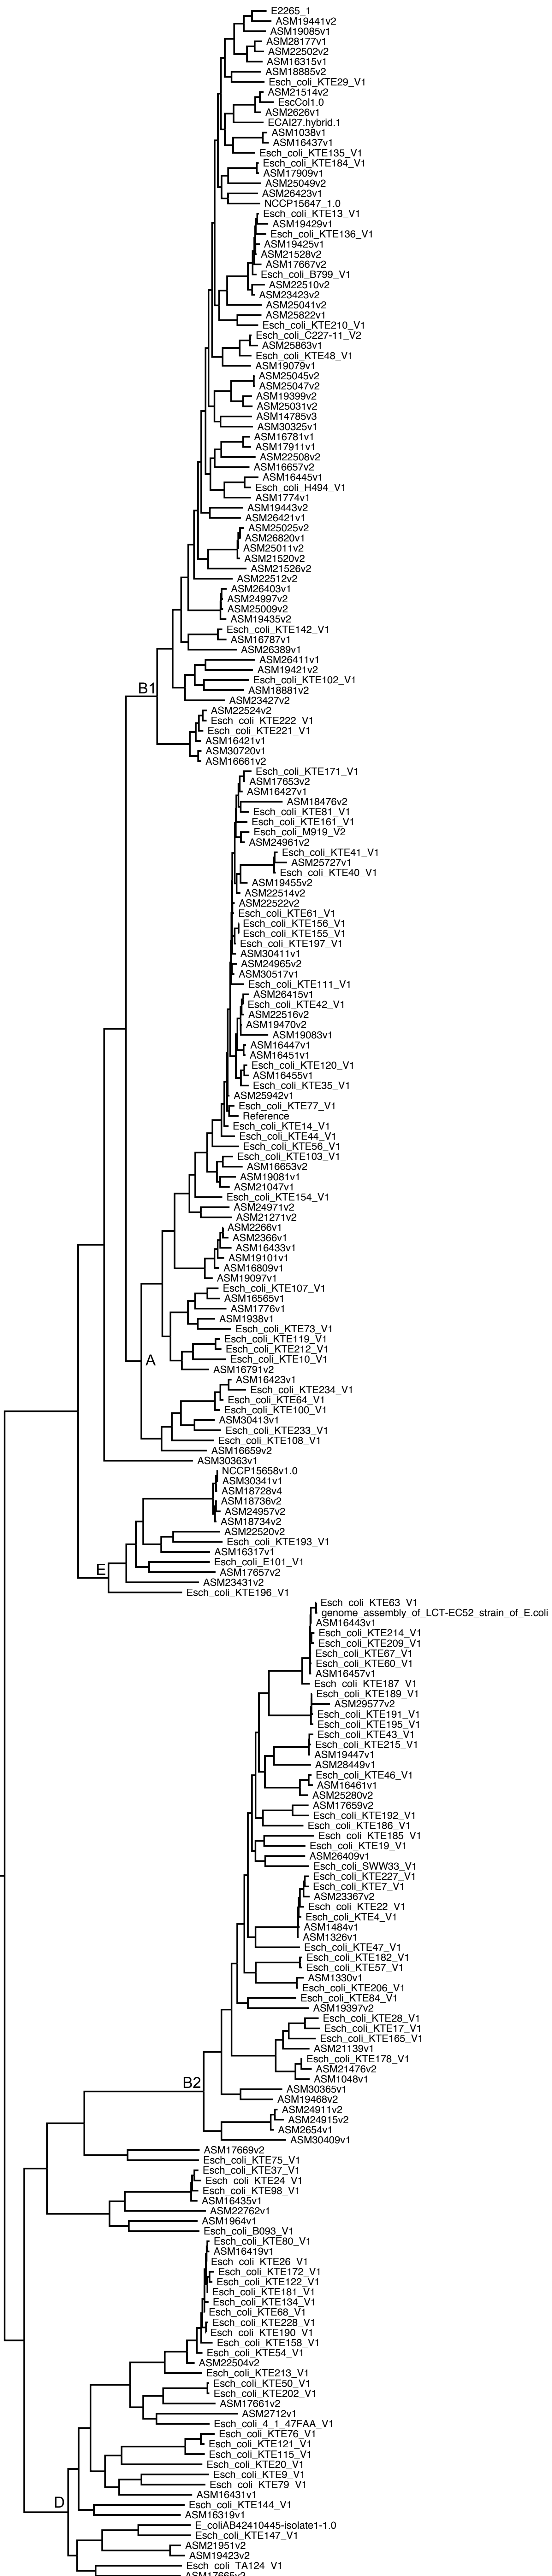

TW10509

0.05
